# Supplementary material
Source: HighWire-hosted journal article supplement (https://bmjmedicine.bmj.com/highwire/filestream/348/field_highwire_adjunct_files/3/bmjmed-2022-000154supp004_data_supplement.pdf)
Supplement: bmjmed-2022-000154supp004_data_supplement.pdf [file bmjmed-2022-000154supp004_data_supplement.pdf]

**Appendix 4 :**

Number of missing data across studies concerning HBA1c array taking on consideration completed studies (shaded boxes). Relates the real levels of LOCF imputation

|          | Duration of placebo comparison | Number of subjects | Baseline (J-21 - J1) | Week 12 (J56- J105) | Week 18 (J98 - J147) | Week 26 (J154 - J203) | Week 52 (J337 - J386) |
|----------|--------------------------------|--------------------|----------------------|---------------------|----------------------|-----------------------|-----------------------|
|          |                                |                    | NA (%)               | NA (%)              | NA (%)               | NA (%)                | NA (%)                |
| Study 1  | 12                             | 386                | 11 (2.8)             | 50 (13)             | 382 (99)             | 386 (100)             | 386 (100)             |
| Study 2  | 18                             | 279                | 1 (0.4)              | 21 (7.5)            | 25 (9)               | 278 (99.6)            | 279 (100)             |
| Study 3  | 52                             | 469                | 2 (0.4)              | 40 (8.5)            | 53 (11.3)            | 84 (17.9)             | 156 (33.3)            |
| Study 4  | 52                             | 269                | 0 (0)                | 13 (4.8)            | 22 (8.2)             | 35 (13)               | 62 (23)               |
| Study 5  | 26                             | 678                | 4 (0.6)              | 50 (7.4)            | 65 (9.6)             | 93 (13.7)             | 678 (100)             |
| Study 6  | 26                             | 918                | 3 (0.3)              | 50 (5.4)            | 81 (8.8)             | 118 (12.9)            | 918 (100)             |
| Study 7  | > 52                           | 4330               | 28 (0.6)             | 287 (6.6)           | 342 (7.9)            | 454 (10.5)            | 704 (16.3)            |
| Study 8  | 26                             | 716                | 6 (0.8)              | 46 (6.4)            | 63 (8.8)             | 84 (11.7)             | 137 (19.1)            |
| Study 9  | 26                             | 342                | 2 (0.6)              | 18 (5.3)            | 30 (8.8)             | 40 (11.7)             | 342 (100)             |
| Study 10 | 18                             | 676                | 1 (0.1)              | 23 (3.4)            | 26 (3.8)             | 672 (99.4)            | 676 (100)             |
| Study 11 | > 52                           | 5813               | 2 (0)                | 332 (5.7)           | 4963 (85.4)          | 439 (7.6)             | 700 (12)              |
| Study 12 | 26                             | 218                | 1 (0.5)              | 24 (11)             | 203 (93.1)           | 43 (19.7)             | 218 (100)             |
| Total    |                                | 15094              | 61 (0.4)             | 954 (6.3)           | 6255 (41.4)          | 2726 (18.1)           | 5256 (34.8)           |
